# Supplementary material
Source: HighWire-hosted journal article supplement (https://tobaccocontrol.bmj.com/content/tobaccocontrol-2017-054053)
Supplement: inline-supplementary-material-1 [file inline-supplementary-material-1.pdf]

## APPENDIX

Table A1: Summary Statistics of All the Variables

| Variables         | Percentage<br>(Standard Errors)                                              |
|-------------------|------------------------------------------------------------------------------|
| Up-trade or not   | Up-trade<br>26.531<br>(0.012)                                                |
|                   | Otherwise<br>73.469<br>(0.012)                                               |
| Down-trade or not | Down-trade<br>29.116<br>(0.012)                                              |
|                   | Otherwise<br>70.884<br>(0.012)                                               |
| Change in income  | Income increased<br>34.848<br>(0.018)                                        |
|                   | Income decreased<br>65.152<br>(0.018)                                        |
| Education         | Illiterate<br>28.100<br>(0.017)                                              |
|                   | Less educated (1-8 years of schooling)<br>48.347<br>(0.019)                  |
|                   | More educated (9 or more years of schooling)<br>23.554<br>(0.016)            |
| Rural             | Rural<br>68.871<br>(0.017)                                                   |
|                   | Urban<br>31.129<br>(0.012)                                                   |
| Addiction Level   | Less addicted (first smoke after one hour of waking up)<br>38.979<br>(0.008) |
|                   | More addicted (first smoke within one hour of waking up)<br>61.02<br>(0.008) |

Table A2: Summary Statistics (Mean and Standard Errors) for Full Sample and by Cigarette Price Tier

| Variables                                                                                   | All                              | Low                              | Medium                         | High                           | Premium                        |
|---------------------------------------------------------------------------------------------|----------------------------------|----------------------------------|--------------------------------|--------------------------------|--------------------------------|
| Up-trade or not<br>(1 – up-trade, 0 – otherwise)                                            | 0.198<br>(0.009)<br>Obs: 1971    | -                                | -                              | -                              | -                              |
| Down-trade or not<br>(1 – down-trade, 0 – otherwise)                                        | 0.269<br>(0.011)<br>Obs: 1590    | -                                | -                              | -                              | -                              |
| Change in Income<br>(range: -22706 – 20436)                                                 | -250.287<br>(0.090)<br>Obs: 4112 | -685.925<br>(0.161)<br>Obs: 1050 | -69.088<br>(0.220)<br>Obs: 802 | 755.233<br>(0.330)<br>Obs: 433 | 536.213<br>(0.499)<br>Obs: 223 |
| Education<br>(1 - illiterate, 2 - 1-8 years of schooling, 3 - 9 or more years of schooling) | 1.915<br>(0.010)<br>Obs: 4790    | 1.712<br>(0.018)<br>Obs: 1161    | 1.998<br>(0.022)<br>Obs: 924   | 2.423<br>(0.028)<br>Obs: 511   | 2.700<br>(0.032)<br>Obs: 261   |
| Age<br>(range: 15-107)                                                                      | 39.710<br>(0.227)<br>Obs: 4800   | 39.470<br>(0.447)<br>Obs: 1162   | 37.358<br>(0.493)<br>Obs: 927  | 32.992<br>(0.532)<br>Obs: 511  | 33.091<br>(0.674)<br>Obs: 263  |
| Urban<br>(0 - rural, 1 - urban)                                                             | 0.344<br>(0.007)<br>Obs: 4800    | 0.202<br>(0.012)<br>Obs: 1162    | 0.369<br>(0.016)<br>Obs: 927   | 0.665<br>(0.021)<br>Obs: 511   | 0.844<br>(0.022)<br>Obs: 263   |
| Addiction Level (0 - less addicted, 1 – more addicted)                                      | 0.610<br>(0.008)<br>Obs: 3389    | 0.660<br>(0.014)<br>Obs: 1110    | 0.632<br>(0.016)<br>Obs: 888   | 0.507<br>(0.023)<br>Obs: 481   | 0.419<br>(0.032)<br>Obs: 246   |

Table A3: Summary Statistics (Mean and Standard Errors) for Full Sample and by Price Tier Switch

| Variables                                                                                      | All                              | Unchanged                                 | Up-trade                        | Down-trade                      |
|------------------------------------------------------------------------------------------------|----------------------------------|-------------------------------------------|---------------------------------|---------------------------------|
| Change in Income<br>(range: -22706 – 20436)                                                    | -250.287<br>(0.090)<br>Obs: 4112 | - -<br>441.450<br>)<br>0.156<br>Obs: 1402 | 1566.281<br>(0.354)<br>Obs: 349 | -845.185<br>(0.322)<br>Obs: 370 |
| Education<br>(1 - illiterate, 2 - 1-8 years of schooling, 3 -<br>9 or more years of schooling) | 1.915<br>(0.010)<br>Obs: 4790    | 1.953<br>(0.017)<br>Obs: 1577             | 2.281<br>(0.033)<br>Obs: 388    | 2.042<br>(0.032)<br>Obs: 426    |
| Age<br>(range: 15-107)                                                                         | 39.710<br>(0.227)<br>Obs: 4800   | 37.104<br>(0.361)<br>Obs: 1581            | 36.236<br>(0.717)<br>Obs: 390   | 35.086<br>(0.663)<br>Obs: 428   |
| Urban<br>(0 - rural, 1 - urban)                                                                | 0.344<br>(0.007)<br>Obs: 4800    | 0.361<br>(0.012)<br>Obs: 1581             | 0.546<br>(0.025)<br>Obs: 390    | 0.404<br>(0.024)<br>Obs: 428    |
| Addiction Level (0 - less addicted, 1 –<br>more addicted)                                      | 0.610<br>(0.008)<br>Obs: 3389    | 0.642<br>(0.012)<br>Obs: 1513             | 0.556<br>(0.026)<br>Obs: 369    | 0.619<br>(0.024)<br>Obs: 407    |

Table A4: Effects of change in price, change in income, change in addiction level along with other demographic variables on probability to up-trade or not

| Variables                       | Dependent variable: Probability to Up-trade |                     |                     |                     |
|---------------------------------|---------------------------------------------|---------------------|---------------------|---------------------|
|                                 | Marginal Effects                            |                     |                     |                     |
|                                 | Model 1                                     | Model 2             | Model 3             | Model 4             |
| Δ in actual self-reported price | 0.012***<br>(0.002)                         | -                   | -                   | -                   |
| Δ in actual tax                 | -                                           | 0.017***<br>(0.001) | -                   | -                   |
| Δ in village-level mean price   | -                                           | -                   | 0.007***<br>(0.003) | -                   |
| Δ in predicted price            | -                                           | -                   | -                   | 0.010***<br>(0.002) |
| Δ in income                     | 0.003<br>(0.002)                            | 0.001<br>(0.002)    | 0.006***<br>(0.002) | 0.002<br>(0.002)    |
| Δ in addiction                  | 0.019<br>(0.018)                            | 0.008<br>(0.017)    | 0.002<br>(0.019)    | 0.017<br>(0.019)    |
| Age                             | 0.000<br>(0.001)                            | 0.001<br>(0.001)    | -0.002*<br>(0.001)  | -0.001<br>(0.001)   |
| Less educated                   | 0.080***<br>(0.022)                         | 0.077***<br>(0.022) | 0.099***<br>(0.024) | 0.076***<br>(0.027) |
| More educated                   | 0.144***<br>(0.032)                         | 0.098***<br>(0.030) | 0.227***<br>(0.033) | 0.167***<br>(0.036) |
| Urban                           | 0.043*<br>(0.023)                           | 0.025<br>(0.022)    | 0.073***<br>(0.024) | 0.071***<br>(0.025) |

Notes: Standard errors are given in parentheses, \* indicates significance at the 10% level, \*\* indicates significance at the 5% level, \*\*\* at the 1% level. For the education category, illiterate is the reference group and for urban, rural is the reference group.

Table A5: Effects of change in price, change in income, change in addiction level along with other demographic variables on probability to up-trade or not

| Variables                       | Dependent variable: Probability to Down-trade |                      |                      |                      |
|---------------------------------|-----------------------------------------------|----------------------|----------------------|----------------------|
|                                 | Marginal Effects                              |                      |                      |                      |
|                                 | Model 1                                       | Model 2              | Model 3              | Model 4              |
| Δ in actual self-reported price | -0.023***<br>(0.001)                          | -                    | -                    | -                    |
| Δ in actual tax                 | -                                             | -0.033***<br>(0.002) | -                    | -                    |
| Δ in village-level mean price   | -                                             | -                    | -0.013***<br>(0.003) | -                    |
| Δ in predicted price            | -                                             | -                    | -                    | -0.014***<br>(0.003) |
| Δ in income                     | 0.001<br>(0.002)                              | 0.002<br>(0.003)     | -0.007**<br>(0.003)  | -0.000<br>(0.003)    |
| Δ in addiction                  | -0.049***<br>(0.019)                          | -0.056**<br>(0.023)  | -0.041*<br>(0.024)   | -0.062**<br>(0.025)  |
| Age                             | -0.000<br>(0.001)                             | -0.001<br>(0.001)    | 0.000<br>(0.001)     | 0.000<br>(0.001)     |
| Less educated                   | -0.065*<br>(0.034)                            | -0.041<br>(0.042)    | -0.049<br>(0.049)    | -0.014<br>(0.049)    |
| More educated                   | -0.133***<br>(0.038)                          | -0.068<br>(0.042)    | -0.186***<br>(0.050) | -0.118**<br>(0.053)  |
| Urban                           | -0.096***<br>(0.026)                          | -0.105***<br>(0.032) | -0.119***<br>(0.032) | -0.115***<br>(0.032) |

Notes: Standard errors are given in parentheses, \* indicates significance at the 10% level, \*\* indicates significance at the 5% level, \*\*\* at the 1% level. For the education category, illiterate is the reference group and for urban, rural is the reference group.

Table A6: Multi-logit regression results

| Variables                       | Marginal Effects    |                     |                     |                     |                      |                      |                      |                      |
|---------------------------------|---------------------|---------------------|---------------------|---------------------|----------------------|----------------------|----------------------|----------------------|
|                                 | Up-trade            |                     |                     |                     | Down-trade           |                      |                      |                      |
|                                 | Model 1             | Model 2             | Model 3             | Model 4             | Model1               | Model 2              | Model 3              | Model 4              |
| Δ in actual self-reported price | 0.014***<br>(0.002) | -                   | -                   | -                   | -0.024***<br>(0.002) | -                    | -                    | -                    |
| Δ in actual tax                 | -                   | 0.017***<br>(0.001) | -                   | -                   | -                    | -0.029***<br>(0.002) | -                    | -                    |
| Δ in village-level mean price   | -                   | -                   | 0.006**<br>(0.003)  | -                   | -                    | -                    | -0.008***<br>(0.003) | -                    |
| Δ in predicted price            | -                   | -                   | -                   | 0.010***<br>(0.002) | -                    | -                    | -                    | -0.008***<br>(0.002) |
| Δ in income                     | 0.003*<br>(0.002)   | 0.002<br>(0.002)    | 0.007***<br>(0.002) | 0.003<br>(0.002)    | -0.001<br>(0.002)    | -0.000<br>(0.002)    | -0.005**<br>(0.002)  | -0.002<br>(0.002)    |
| Δ in addiction                  | 0.006<br>(0.016)    | 0.000<br>(0.016)    | -0.002<br>(0.019)   | 0.010<br>(0.019)    | -0.023*<br>(0.013)   | -0.025*<br>(0.014)   | -0.028<br>(0.018)    | -0.037*<br>(0.019)   |
| Age                             | 0.000<br>(0.001)    | 0.001<br>(0.001)    | -0.001*<br>(0.001)  | -0.001<br>(0.001)   | -0.001<br>(0.001)    | -0.001**<br>(0.001)  | -0.001<br>(0.001)    | -0.001<br>(0.001)    |
| Less educated                   | 0.078***<br>(0.024) | 0.079***<br>(0.025) | 0.098***<br>(0.023) | 0.079***<br>(0.027) | 0.010<br>(0.019)     | 0.022<br>(0.019)     | 0.033<br>(0.030)     | 0.044<br>(0.030)     |
| More educated                   | 0.096***<br>(0.031) | 0.060**<br>(0.030)  | 0.191***<br>(0.032) | 0.145***<br>(0.035) | -0.018<br>(0.026)    | 0.039<br>(0.028)     | -0.032<br>(0.033)    | 0.001<br>(0.036)     |
| Urban                           | 0.018<br>(0.021)    | -0.008<br>(0.022)   | 0.045*<br>(0.024)   | 0.044*<br>(0.025)   | -0.027<br>(0.021)    | -0.001<br>(0.020)    | -0.019<br>(0.026)    | -0.015<br>(0.027)    |

Notes: Standard errors are given in parentheses, \* indicates significance at the 10% level, \*\* indicates significance at the 5% level, \*\*\* at the 1% level. For the education category, illiterate is the reference group and for urban, rural is the reference group.

Table A7: Probit Regression Results - Effects of Down-trading, Changes in Prices, Income levels and Addiction levels on Probability to intend to Quit or not

| Dependent variable: Probability to intend to quit       |                     |                     |                     |                     |
|---------------------------------------------------------|---------------------|---------------------|---------------------|---------------------|
| Variables                                               | Marginal Effects    |                     |                     |                     |
|                                                         | Model 1             | Model 2             | Model 3             | Model 4             |
| Down-trade or not<br>(1 – down-trade, 0<br>– otherwise) | -0.012<br>(0.042)   | -0.007<br>(0.043)   | -0.015<br>(0.033)   | -0.015<br>(0.034)   |
| Δ in actual self-<br>reported price                     | 0.000<br>(0.001)    | -                   | -                   | -                   |
| Δ in actual tax                                         | -                   | 0.001<br>(0.002)    | -                   | -                   |
| Δ in village-level<br>mean price                        | -                   | -                   | 0.006<br>(0.004)    | -                   |
| Δ in predicted price                                    | -                   | -                   | -                   | 0.003<br>(0.003)    |
| Δ in income                                             | 0.003<br>(0.002)    | 0.003<br>(0.002)    | 0.003<br>(0.002)    | 0.002<br>(0.003)    |
| Δ in addiction                                          | 0.074***<br>(0.022) | 0.073***<br>(0.022) | 0.077***<br>(0.021) | 0.077***<br>(0.022) |
| Age                                                     | 0.002**<br>(0.001)  | 0.002**<br>(0.001)  | 0.002**<br>(0.001)  | 0.002**<br>(0.001)  |
| Urban                                                   | -0.053*<br>(0.032)  | -0.053*<br>(0.032)  | -0.064**<br>(0.031) | -0.058*<br>(0.032)  |
| Less educated                                           | 0.020<br>(0.041)    | 0.021<br>(0.041)    | 0.016<br>(0.040)    | 0.011<br>(0.043)    |
| More educated                                           | 0.055<br>(0.045)    | 0.053<br>(0.046)    | 0.043<br>(0.044)    | 0.036<br>(0.048)    |

Notes: Standard errors are given in parentheses, \* indicates significance at the 10% level, \*\* indicates significance at the 5% level, \*\*\* at the 1% level. For the education category, illiterate is the reference group and for urban, rural is the reference group.

Table A8: Cox Regression Results: Hazard Ratios

| Up-trade                   | Hazard ratios (95% CI)      |                              |                             |                             |
|----------------------------|-----------------------------|------------------------------|-----------------------------|-----------------------------|
|                            | Model 1 (N = 1507)          | Model 2 (N = 1500)           | Model 3 (N = 1651)          | Model 4 (N = 1518)          |
| Actual self-reported price | 5.778***<br>(3.678 – 9.077) | -                            | -                           | -                           |
| Actual tax                 | -                           | 5.572***<br>(2.942 – 10.554) | -                           | -                           |
| Village-level mean price   | -                           | -                            | 1.483**<br>(1.096 – 2.006)  | -                           |
| Predicted price            | -                           | -                            | -                           | 1.932***<br>(1.347 – 2.772) |
| Income                     | 1.511***<br>(1.129 – 2.022) | 1.542***<br>(1.151 – 2.064)  | 1.631***<br>(1.225 – 2.172) | 1.380**<br>(1.021 – 1.866)  |
| Addiction                  | 1.293<br>(0.886 – 1.886)    | 1.199<br>(0.822 – 1.749)     | 1.200<br>(0.827 – 1.740)    | 1.354<br>(0.925 – 1.982)    |
| Age                        | 0.996<br>(0.986 – 1.007)    | 0.994<br>(0.984 – 1.005)     | 0.992<br>(0.982 – 1.003)    | 0.995<br>(0.984 – 1.005)    |
| Less educated              | 2.378***<br>(1.387 – 4.076) | 2.578***<br>(1.507 – 4.411)  | 2.648***<br>(1.549 – 4.527) | 2.111***<br>(1.227 – 3.632) |
| More educated              | 2.938***<br>(1.691 – 5.106) | 3.824***<br>(2.205 – 6.631)  | 4.169***<br>(2.411 – 7.209) | 3.168***<br>(1.807 – 5.553) |
| Urban                      | 1.217<br>(0.900 – 1.645)    | 1.345*<br>(0.994 – 1.822)    | 1.267<br>(0.941 – 1.707)    | 1.307*<br>(0.966 – 1.768)   |
| Down-trade                 | Hazard ratios (95% CI)      |                              |                             |                             |
|                            | Model 1 (N = 1507)          | Model 2 (N = 1500)           | Model 3 (N = 1651)          | Model 4 (N = 1518)          |
| Actual self-reported price | 0.080***<br>(0.048 – 0.132) | -                            | -                           | -                           |
| Actual tax                 | -                           | 0.056***<br>(0.037 – 0.083)  | -                           | -                           |
| Village-level mean price   | -                           | -                            | 0.754**<br>(0.574 – 0.992)  | -                           |
| Predicted price            | -                           | -                            | -                           | 0.572***<br>(0.422 – 0.777) |
| Income                     | 0.910<br>(0.679 – 1.220)    | 0.991<br>(0.739 – 1.329)     | 0.872<br>(0.656 – 1.159)    | 0.989<br>(0.730 – 1.339)    |
| Addiction                  | 0.751<br>(0.500 – 1.128)    | 0.835<br>(0.556 – 1.255)     | 0.745<br>(0.498 – 1.116)    | 0.738<br>(0.490 – 1.110)    |
| Age                        | 0.996<br>(0.697 – 1.300)    | 1.000<br>(0.990 – 1.010)     | 0.997<br>(0.988 – 1.007)    | 0.998<br>(0.989 – 1.008)    |
| Less educated              | 1.172<br>(0.831 – 1.653)    | 1.012<br>(0.716 – 1.429)     | 1.272<br>(0.903 – 1.791)    | 1.300<br>(0.914 – 1.849)    |
| More educated              | 1.399<br>(0.910 – 2.149)    | 1.000<br>(0.654 – 1.530)     | 0.977<br>(0.903 – 1.791)    | 1.080<br>(0.696 – 1.676)    |
| Urban                      | 0.952<br>(0.697 – 1.300)    | 0.809<br>(0.594 – 1.101)     | 0.866<br>(0.639 – 1.173)    | 0.865<br>(0.634 – 1.181)    |



| Quit                       | Hazard ratios (95% CI)     |                            |                             |                            |
|----------------------------|----------------------------|----------------------------|-----------------------------|----------------------------|
|                            | Model 1 (N = 709)          | Model 2 (N = 706)          | Model 3 (N = 751)           | Model 4 (N = 713)          |
| Down-trade                 | 0.977<br>(0.487 – 1.960)   | 0.995<br>(0.446 – 2.219)   | 0.901<br>(0.545 – 1.488)    | 0.884<br>(0.532 – 1.468)   |
| Actual self-reported price | 1.115<br>(0.589 – 2.111)   | -                          | -                           | -                          |
| Actual tax                 | -                          | 1.141<br>(0.515 – 2.529)   | -                           | -                          |
| Village-level mean price   | -                          | -                          | 1.266<br>(0.812 – 1.974)    | -                          |
| Predicted price            | -                          | -                          | -                           | 0.959<br>(0.592 – 1.552)   |
| Income                     | 1.422<br>(0.924 – 2.188)   | 1.428<br>(0.930 – 2.195)   | 1.422<br>(0.927 – 2.181)    | 1.427<br>(0.911 – 2.235)   |
| Addiction                  | 1.841**<br>(1.134 – 2.988) | 1.829**<br>(1.127 – 2.969) | 1.971***<br>(1.222 – 3.178) | 1.833**<br>(1.121 – 2.998) |
| Age                        | 1.017**<br>(1.003 – 1.033) | 1.017**<br>(1.002 – 1.032) | 1.018**<br>(1.003 – 1.033)  | 1.017**<br>(1.002 – 1.032) |
| Less educated              | 1.164<br>(0.622 – 2.177)   | 1.165<br>(0.623 – 2.178)   | 1.154<br>(0.619 – 2.152)    | 1.165<br>(0.618 – 2.198)   |
| More educated              | 1.437<br>(0.742 – 2.781)   | 1.434<br>(0.741 – 2.775)   | 1.366<br>(0.707 – 2.639)    | 1.420<br>(0.722 – 2.794)   |
| Urban                      | 0.630*<br>(0.394 – 1.008)  | 0.631*<br>(0.395 – 1.010)  | 0.592**<br>(0.370 – 0.947)  | 0.632*<br>(0.395 – 1.011)  |

Notes: 95% confidence intervals are given in the parentheses, \* indicates significance at the 10% level, \*\* indicates significance at the 5% level, \*\*\* at the 1% level. For the education category, illiterate is the reference group and for urban, rural is the reference group.
